# Supplementary material
Source: Research Square preprint supplement (doi:10.21203/rs.3.rs-9007914/v1)
Supplement: Supplementary file 1 [file c796732efcf05130453aaf6d.docx]

**Supplementary Material 1: Classification and Description of 11 Residue-Sampled Stone Artifacts from the Wenquan site**

Flake

Flake (23wq:1480), a complete flake. The raw material is andesite. It is lightly weathered and abraded. The overall shape is nearly an inverted triangle. It has a length of 69.52 mm; its width is 26.66 mm; thickness, 26.29 mm; and its weight, 36.6 g. It was simply detached using direct hard hammer percussion. It is a Type III flake with a natural platform. The platform width is 35.72 mm, and thickness is 26.88 mm. The flake angle is 116 degrees, and the dorsal edge angle is 72 degrees. The ventral surface is slightly convex. The point of percussion is diffuse, and the bulb of percussion is slightly convex. Features such as radial fissures, half-cone, concentric ripples, flake lip, and eraillure scares are absent. The distal end is feathered. The dorsal surface is devoid of cortex and exhibits three flake scars, unidirectionally removed from proximal to distal. The edges of the flake are lightly abraded.

Large Flake 1 (23wq:563), a complete flake. The raw material is quartzite. It is moderately weathered and abraded. The overall shape is nearly triangular. It has a length of 192 mm; its width is 253 mm; thickness, 86 mm; and its weight, 4184 g. It was simply detached using direct percussion. It is a Type III flake with a natural platform. The platform width is 119 mm, and thickness is 86 mm. The flake angle is 100 degrees, and the dorsal edge angle is 107 degrees. The ventral surface is slightly convex. The point of percussion is diffuse, and the bulb of percussion is slightly convex. Features such as radial fissures, half-cone, concentric ripples, flake lip, and eraillure scares are absent. The distal end is feathered. The dorsal surface is devoid of cortex and exhibits one flake scar. The edges of the flake are lightly abraded. The distal end exhibits possible use-wear.

Large Flake 2 (23wq:1032), a complete flake. The raw material is quartzite. It is lightly weathered and abraded. The overall shape is nearly triangular. It has a length of 185.56 mm; its width is 276.1 mm; thickness, 110.34 mm; and its weight, 4530.4 g. It was simply detached using the bipolar percussion technique. It is a Type I flake with a natural platform. The platform width is 171.19 mm, and thickness is 111 mm. The flake angle is 121 degrees, and the dorsal edge angle is 91 degrees. The ventral surface is slightly convex. The point of percussion is diffuse, and the bulb of percussion is slightly convex. Features such as radial fissures, half-cone, concentric ripples, flake lip, and eraillure scares are absent. The distal end is feathered. The dorsal surface is a cobble surface. The edges of the flake are lightly abraded.

Large Flake 3 (23wq:1344), a complete flake. The raw material is rhyolite. It is lightly weathered and abraded. The overall shape is nearly trapezoidal. It has a length of 198 mm; its width is 315 mm; thickness, 99 mm; and its weight, 5961 g. It was simply detached using direct percussion. It is a Type II flake with a natural platform. The platform width is 218 mm, and thickness is 33 mm. The flake angle is 106 degrees, and the dorsal edge angle is 115 degrees. The ventral surface is slightly convex. The point of percussion is distinct, and the bulb of percussion is slightly convex. Radial fissures are present. Features such as half-cone, concentric ripples, flake lip, and eraillure scares are absent. The distal end is feathered. The dorsal surface has a relatively large number of gravelly surfaces, exhibiting one flake scar oriented unidirectionally from proximal to distal. The edges of the flake are lightly abraded. The distal end exhibits possible use-wear.

Acheulean large tools

Handaxe (22wq:160), raw material is propylite. It is moderately weathered and abraded. It has a length of 183 mm; its width is 156 mm; thickness, 60 mm; and its weight, 1607 g. The blank is a large flake. It has been unifacially retouched on both lateral edges to converge into a pointed tip. The edge angle is medium, at 56 degrees. The retouch scars are single-layered, discontinuous, shallow, and squamous in morphology. The retouching is extensive. It resembles a handaxe.

Pick (23wq:908), raw material is andesite. It is moderately weathered and abraded. It has a length of 162.74 mm; its width is 111.85 mm; thickness, 72.19 mm; and its weight, 1261 g. The blank is a block. It has been bifacially retouched. The edge angle is medium, at 68 degrees. The retouch scars are double-layered, continuous, moderately deep, and exhibit both squamous and stepped morphology. The retouch is marginal.

Cleaver (22wq:222), raw material is andesite. It is lightly weathered and abraded. It has a length of 165 mm; and its width is 103 mm; thickness, 44 mm; and its weight, 737 g. The blank is a large flake. Unifacial retouch has been applied to the right lateral edge to facilitate handling. It possesses two edges. Edge 1 exhibits several small flake scars, possibly use-wear scars, characteristic of a "V"-shaped cleaver. On the left lateral edge, near the platform, there is a larger flake scar, possibly for prehensile modification, allowing the distal end of the flake to be used as Edge 2 when held in the right hand. This specimen could also function as a heavy scraper.

Scraper

Heavy Scraper 1 (23wq:1138), raw material is quartzite. It is moderately weathered and abraded. It has a length of 250.64 mm; its width is 138.64 mm; thickness, 72.24 mm; and its weight, 3342.2 g. The blank is a flake. It has been inversely retouched on the lateral edge, forming a single working edge. The edge length is 240.65 mm. The edge morphology is convex, and the edge angle is medium, at 64 degrees. The retouch scars are double-layered, continuous, moderately deep, and exhibit both squamous and stepped morphology. The retouch is of intermediate depth.

Heavy Scraper 2 (23wq:1341), raw material is rhyolite. It is lightly weathered and abraded. It has a length of 295 mm; its width is 139.8 mm; thickness, 61.8 mm; and its weight, 2417.2 g. The blank is a blade. It has been bifacially retouched on the lateral edge, forming a single working edge. The edge length is 250.13 mm. The edge morphology is straight, and the edge angle is medium, at 52 degrees. The retouch scars are single-layered, continuous, shallow, and exhibit both squamous and stepped morphology. The retouch is of intermediate depth. The proximal end appears to have been modified for prehension.

Scraper (23wq:965), raw material is quartzite. It is lightly weathered and abraded. It has a length of 43.39 mm; its width is 47.99 mm; thickness, 14.85 mm; and its weight, 33.7 g. The blank is a flake. It has been alternately retouched on the distal end, forming a single working edge. The edge length is 42.84 mm. The edge morphology is straight, and the edge angle is medium, at 53 degrees. The retouch scars are single-layered, continuous, shallow, and squamous in morphology. The retouch is of intermediate depth.

Denticulate

Denticulate (23wq:879), raw material is quartzite. It is lightly weathered and abraded. It has a length of 41 mm; its width is 55 mm; thickness, 18 mm; and its weight, 39 g. The blank is a flake. It has been unifacially retouched on the distal end to form a serrated edge. The edge length is 56 mm. The retouch index is 1, and the edge angle is 48 degrees (medium). The retouch scars are single-layered, continuous, deep, and squamous in morphology. The retouch is of intermediate depth.
