# Supplementary material
Source: Research Square preprint supplement (doi:10.21203/rs.3.rs-9007914/v1)
Supplement: Supplementary file 2 [file d9cbc5c78c44f98381a568af.xlsx]

## Sheet: Sheet1
Supplementary Material 2: Comparison and Classification of Starch Grains from Surface Soil Samples and Ultrasonicated Samples
Category		Triticeae		Paniceae		Coix		Trichosanthes		Setaria		Agropyron		Dioscorea		Pueraria		Unidentified		Total		Damaged Grains
Starch Morphotype		Ⅰ		Ⅱ		Ⅲ		Ⅳ		Ⅴ		Ⅵ		Ⅶ		Ⅷ		-		-		-
S1	S2	1	-	-	-	1	1	-	-	1	-	-	-	1	-	-	-	-	-	4	1	-	-
S3	S4	-	16	3	12	1	13	-	4	2	1	-	8	-	-	-	2	4	16	10	72	3	16
S5	S6	-	1	-	3	-	1	-	-	-	2	-	-	-	-	-	-	2	3	2	10	1	-
S7	S8	-	7	1	4	1	2	-	2	-	8	-	-	-	1	-	-	1	-	3	24	-	-
S9	S10	1	-	-	-	-	-	1	1	-	-	-	-	-	-	-	-	-	-	2	1	-	-
S11	S12	1	-	-	-	-	1	1	1	-	1	-	1	1	-	-	-	-	1	3	5	-	-
S13	S14	-	-	-	7	-	-	-	-	1	-	1	-	-	-	-	-	2	-	4	7	-	1
S15	S16	-	2	-	1	-	1	3	-	-	-	-	-	1	1	-	-	-	7	4	12	-	7
	S17		2		1		1		-		7		1		1		-		10		23		5
	S18		2		-		-		2		1		-		-		-		-		5		-
	S19		5		1		1		-		-		1		-		-		5		13		7
Surface Soil	Ultrasonicated	3	35	4	29	3	21	5	10	4	20	1	11	3	3	0	2	9	42	32	173	4	36
Total
Percentage （%）		9.38	20.23	12.5	16.76	9.38	12.14	15.63	5.78	12.5	11.56	3.13	6.36	9.38	1.73	0	1.16	28.13	24.3	-	-	12.5	20.81
Frequency （%）		37	63	25	63	37	72	37	45	37	54	12	36	37	27	0	0.9	50	54	-	-	25	45
